# Supplementary material for: Electrical and Mechanical Properties of ZrO2-Y2O3-Al2O3 Composite Solid Electrolytes
Source: Springer Nature journal article supplement (doi:10.1007/s11664-021-09125-x), 2021-07-27
Supplement: MOESM1 [file 19397670]

**Supplementary Material for:**

**Electrical and mechanical properties of  $ZrO_2$ - $Y_2O_3$ - $Al_2O_3$   
composite solid electrolytes**

M. Lubszczyk, J. Wyrwa, K. Wojteczko, J. Pleśniak, M.M. Bućko, M. Rękas, T. Brylewski\*

AGH University of Science and Technology, Faculty of Materials Science and Ceramics,

al. Mickiewicza 30, 30-059 Kraków, Poland

\*Corresponding author: brylew@agh.edu.pl (T. Brylewski)

**Table SI.** Equivalent circuits applied for different samples and temperatures selected for EIS measurements.

| Sample                       | Measurement temperature [K]   | Equivalent circuit                                                                    |
|------------------------------|-------------------------------|---------------------------------------------------------------------------------------|
| 3Y-TZP                       | 573, 673, 723                 | 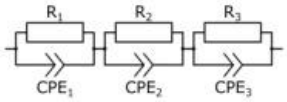 |
|                              | 773, 823, 873, 923, 973       |  |
|                              | 1023                          |  |
| 3Y-TZP/0.5 mol% of $Al_2O_3$ | 573, 673, 723                 |  |
|                              | 773, 823, 873, 923, 973, 1023 |  |

|                                                   |                                |  |
|---------------------------------------------------|--------------------------------|--|
| 3Y-TZP/1.0 mol% of Al <sub>2</sub> O <sub>3</sub> | 573, 673, 723                  |  |
|                                                   | b773, 823, 873, 923, 973, 1023 |  |
| 8-YSZ                                             | 573, 673                       |  |
|                                                   | 773, 823, 873, 923, 973, 1023  |  |
| 8-YSZ/0.5 mol% of Al <sub>2</sub> O <sub>3</sub>  | 573                            |  |
|                                                   | 673, 723                       |  |
|                                                   | 773                            |  |
|                                                   | 873, 923                       |  |
|                                                   | 973, 1023                      |  |
| 8-YSZ/1.0 mol% of Al <sub>2</sub> O <sub>3</sub>  | 573                            |  |
|                                                   | 673                            |  |
|                                                   | 723                            |  |
|                                                   | 773, 823, 873, 923             |  |
|                                                   | 973                            |  |
